# Supplementary material for: EphA4-dependent Brachyury expression is required for dorsal mesoderm involution in the Xenopus gastrula
Source: Oxford University Press journal article supplement (doi:10.1242/dev.111880), 2014-09-11
Supplement: dev111880_supp.pdf [file dev111880_supp.pdf]

## Legends to the Supplementary Figures

**Figure S1.** (A,B) Rescue of EphA4 knockdown (A4MO) by *Xenopus* EphA4 mRNA injection (A4) at indicated doses of MO or mRNA. Top: examples of sagittally fractured embryos at stage 11; bottom, archenteron lengths in experiments shown at top. (C,D) Kinase-dead EphA4 does not rescue and acts dominant-negatively. Top: examples of sagittally fractured embryos at stage 11; bottom, archenteron lengths in experiments shown at top. Asterisks, significant reduction.

**Figure S2.** Marker gene expression in control (A-E) and EphA4-MO embryos (F-J) at stage 11. (A,F) *Gsc*, prechordal mesoderm; (B,G) *Cerberus*, anterior mesendoderm; (C,H) *Chordin*, anterior chordamesoderm; (D,I) *Xbra*, chordamesoderm; (E,J) *Sox2*, neuroectoderm.

**Figure S3.** Control of *Xbra* expression. (A-D) *Xbra* expression under various treatments. A4MO, EphA4-MO; caMEK, constitutively active MEK; SU5402, inhibitor of FGF receptor; U0126, MAPK inhibitor; LY294002, PI3K inhibitor; DMSO, dimethylsulfoxide control.

**Figure S4.** Effect of *Xbra* injection on involution. (A) A4, EphA4-MO; *Xbra*, *Xbra* mRNA; doses as indicated. (B) Archenteron length in experiments shown in (A).

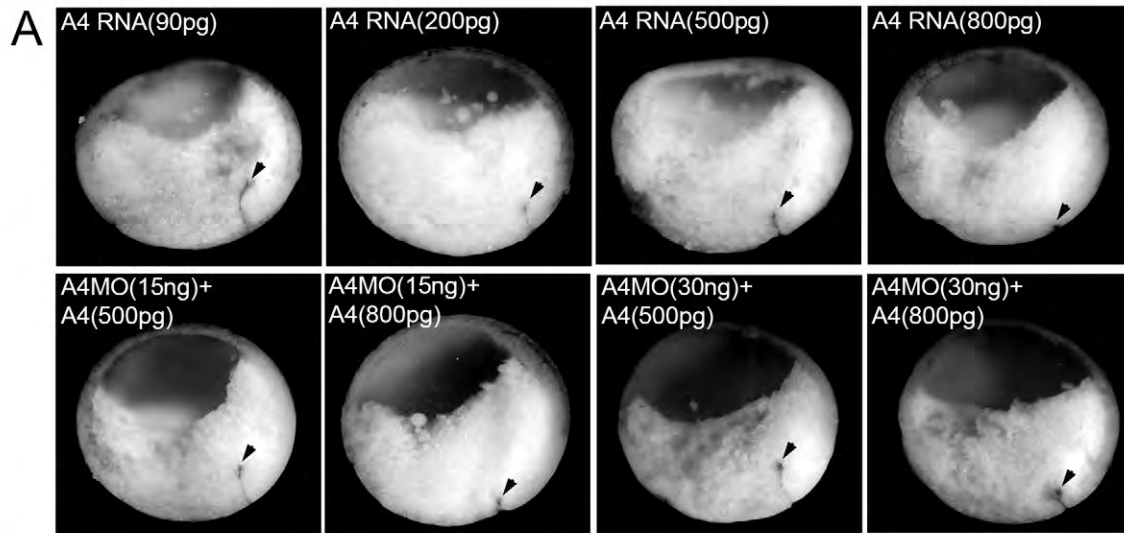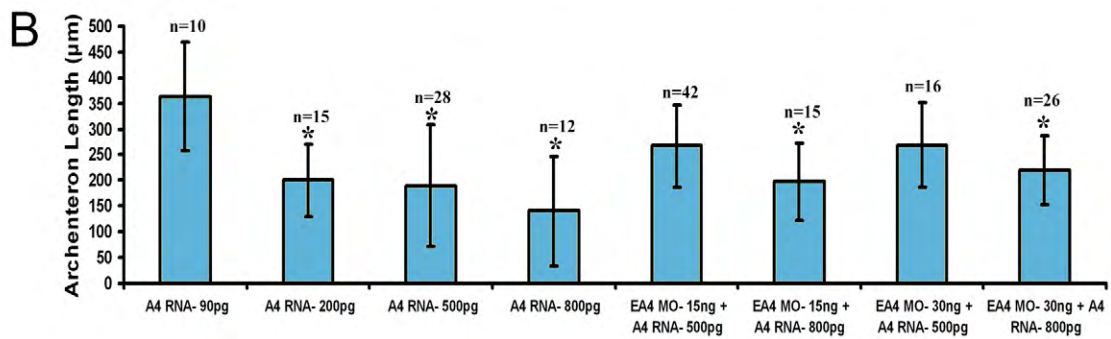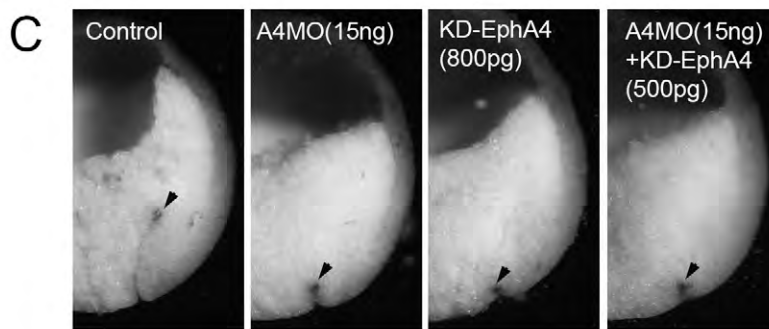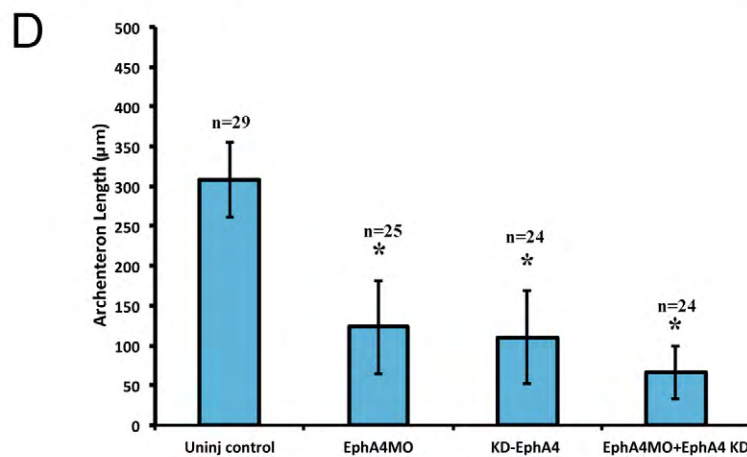

**Figure S1.**

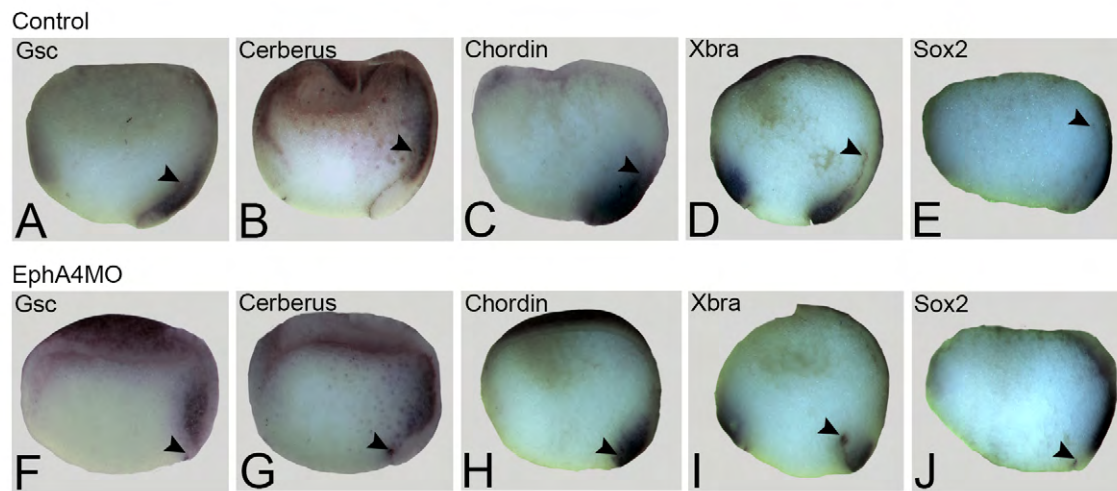

**Figure S2.**

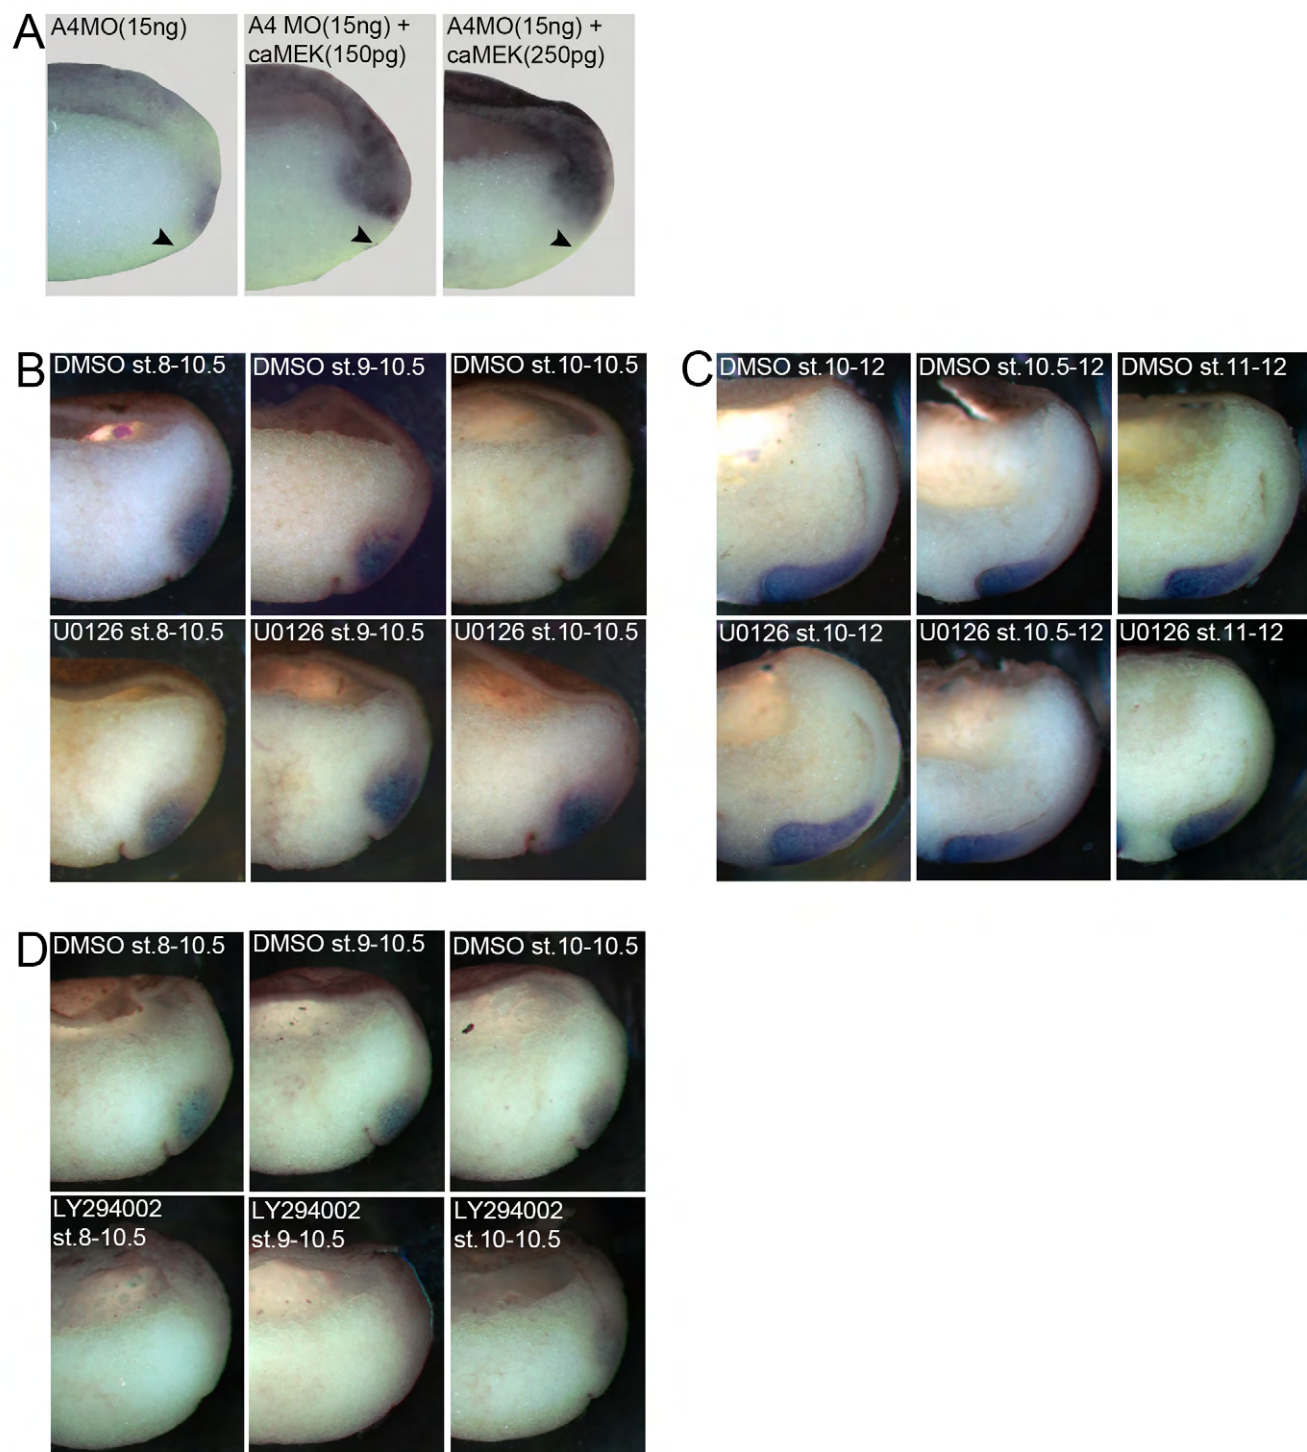

**Figure S3.**

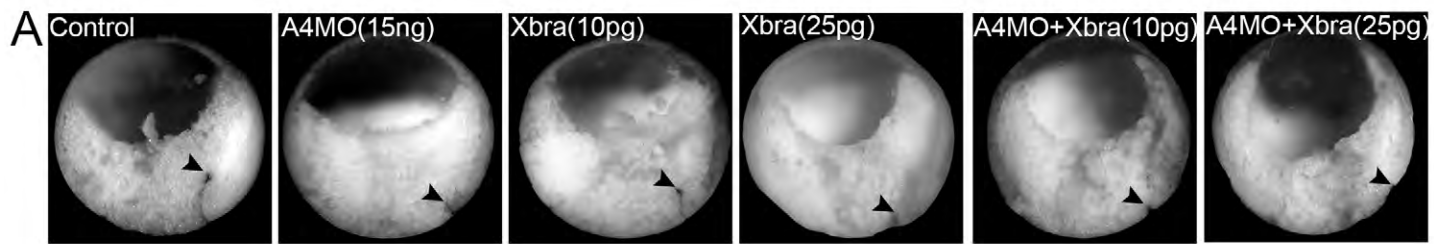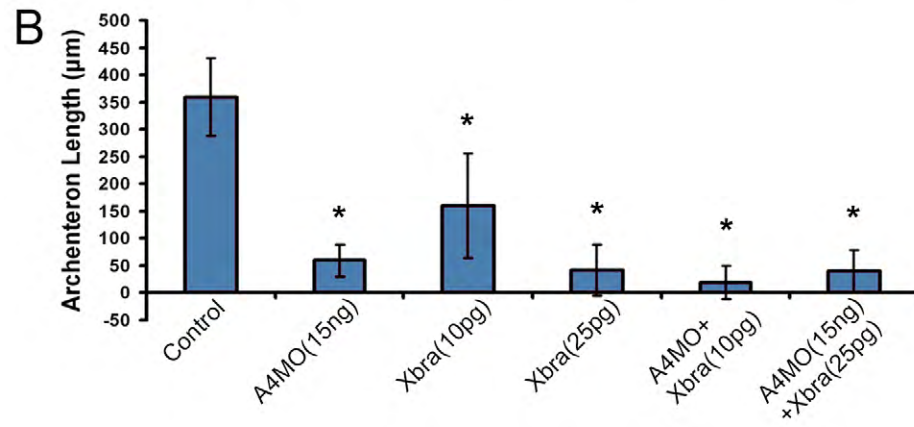

**Figure S4.**

## Movie titles and captions

**Movie 1.** Lip-BCR explant. Explant was made at stage 10+ and filmed for 2 hours. Ectodermal BCR (with darkly pigmented outer surface) is to the left, lip forms on the right. Inner surface is viewed.

**Movie 2.** Open-faced explant. Explant was made at stage 10+ and filmed for 45 min. Former vegetal side is to the left. For details see Fig. 3A.

**Movie 3.** Lip-only explant. Explant was made at stage 10.5 and filmed for 1 hour. Former vegetal side is to the left, cut surface is viewed. For details see Fig. 4E.

**Movie 4.** Explant of Xbra domain. Explant was made at stage 10.5 and filmed for 1 hour. Cut surface is viewed, as in movie 3. For details see Fig. 4H.

**Movie 5.** Explant of Xbra domain in side view. Stage 10.5 explant was filmed for 1 hour, viewed in 45° mirror submerged in culture buffer. For details see Fig. 4I,J.

**Movie 6.** Lip-BCR explant expressing DN-Pak1. Explant was made at stage 10+ and filmed for 2 hours, as in movie 1, from embryo expressing DN-Pak1. Involution movement is compromised. Lip forms at the left, BCR is to the right.

**Movie 7.** Open-faced explants expressing DN-Pak1. Explant was made at stage 10+ from embryo expressing DN-Pak1 and filmed for 1 hour. For details see Fig. 8I.



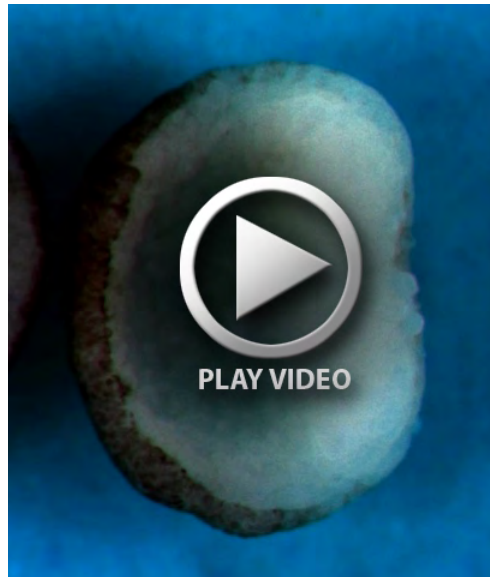

**Movie 1.**

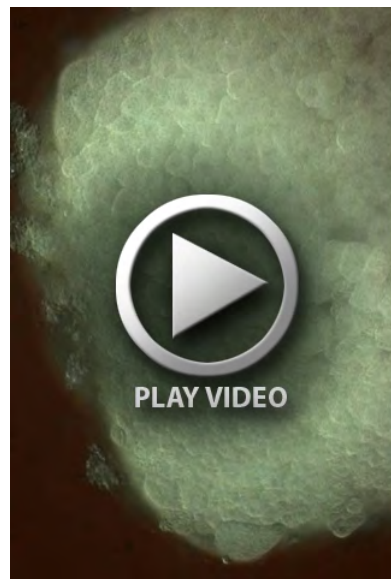

**Movie 2.**

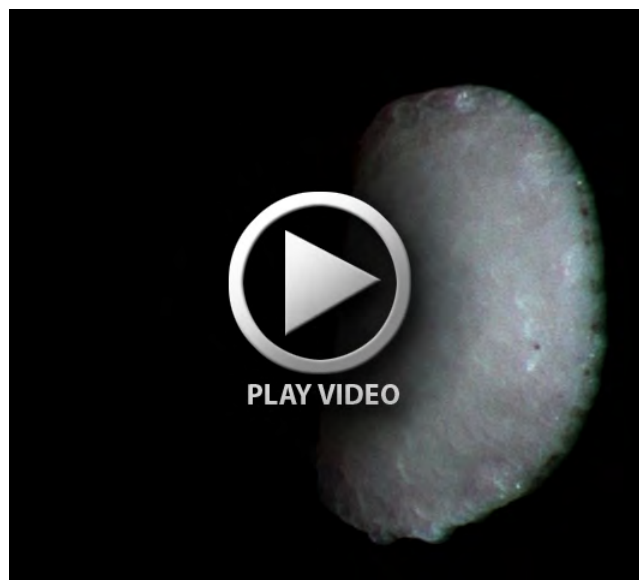

**Movie 3.**

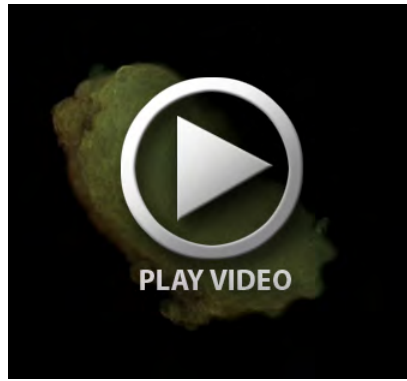

**Movie 4.**

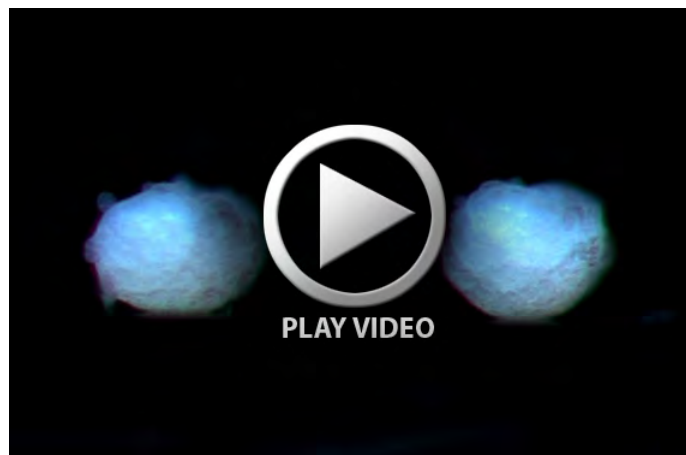

**Movie 5.**

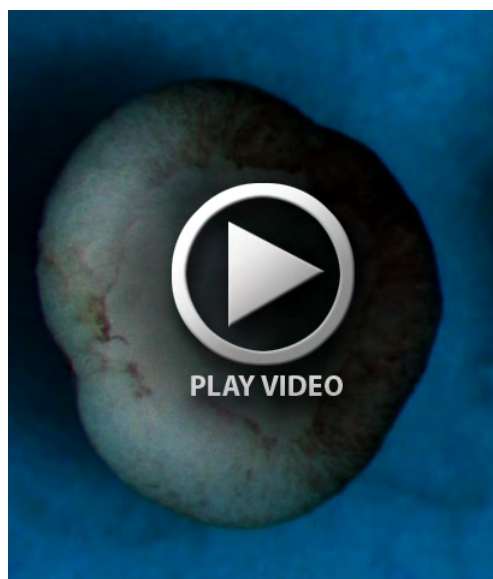

**Movie 6**



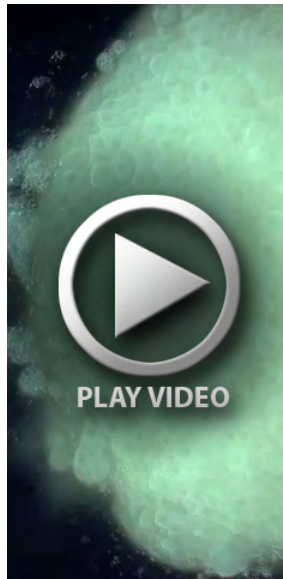

**Movie 7.**
